# Supplementary material for: RecV recombinase system for in vivo targeted optogenomic modifications of single cells or cell populations
Source: Springer Nature journal article supplement (doi:10.1038/s41592-020-0774-3), 2020-03-23
Supplement: MOESM7 [file 41592_2020_774_MOESM7_ESM.xlsx]

## Sheet: Induction
		Target		10 circle		50 circle									Z position
		Total	Convert	Total	Convert	Total	Convert								Start	-1731	19*3	1688
Condition1	Cell1	1	0	0	0	16	1									-1831	14*1	1845	157
	Cell2	1	1	4	1	24	3									-1797	15*1	1812	124
	Cell3	1	1	1	0	17	0									-1828	22*1	1806	118
	Cell4	1	0	7	1	28	2									-1861	17*1	1844	156
	Cell5	0	0	2	0	8	1
									0.5		0.142857		0.0752688
									0.25		0.093522		0.0273573		Start	-1656		1656
Condition2	Cell1	1	1	3	1	19	0									-1794	10*1	1784	128
	Cell2	1	1	3	0	31	2									-1792	19*1	1773	117
	Cell3	0	0	4	1	19	1									-1810	14*1	1796	140
	Cell5	1	1	3	1	19	3									-1736	14*1
	Cell6	1	1	4	1	15	0									-1708	15*1
	Cell7	1	1	5	0	19	3									-1707	14*1
									1		0.181818		0.0737705
									0		0.0822304		0.0236658		Start	-2884		2884
Condition3	Cell1	0	0	4	1	14	0									-3041	17*1	3058	174
	Cell2	1	1	3	0	21	0									-3046	25*1	3021	137
	Cell4	1	0	4	0	30	0									-2995	16*1	3012	128
	Cell5	1	0	2	0	20	0									-3057	26*1	3031	147
									0.333333		0.0769231		0
									0.272166		0.0739053		0		Start	-2652		2452
Condition4	Cell1	1	1	2	0	22	0									-2603	18*1	2621	169
	Cell2	0	0	2	1	13	0									-2613	14*1	2599	147
	Cell3	1	1	2	0	11	1									-2615	18*1	2597	145
	Cell4	1	1	3	1	15	1									-2593	20*1	2573	121
	Cell5	1	1	0	0	4	0									-2576	10*1	2566	114
	Cell7	1	0	5	0	31	1									-2530	11*1	2541	89
									0.8		0.142857		0.03125
									0.178885		0.093522		0.017758

## Sheet: Session 1 red cell
	Total inducible cells	Induced cells in session 1
7F_S	35	0		0		0
7F_F	355	0		0		0
mouse1	194	16		0.0824742		8.24742
mouse2	227	12		0.0528634		5.28634
mouse4	331	10		0.0302115		3.02115
mouse5	298	13		0.0436242		4.36242
7S_X	81	5		0.0617284		6.17284
7S_T	55	0		0		0
